# Supplementary material
Source: ML conference proceedings conference paper supplement (https://openaccess.thecvf.com/content/WACV2024/html/Carmichael_Pixel-Grounded_Prototypical_Part_WACV_2024_paper.html)
Supplement: Supplementary file 2 [file Carmichael_Pixel-Grounded_Prototypical_Part_WACV_2024_supplemental.zip]

Archive with 2 entries (2 files):
- supplemental.pdf
- relevance-ordering-test_example_vgg13_maxpool4_cub200.mp4
